# Supplementary material
Source: Springer Nature journal article supplement (https://www.springermedizin.de/resource/supplementary/12888_2007_445_MOESM1_ESM.pdf/9483310)
Supplement: MOESM1 [file 9483310]

**1**

**Per capita income  
Primary Income Earner's schooling**

**Mother's schooling  
Professional schooling**

**Age**

**2**

**Skin color**

**3**

**Marital status**

**Religion**

**Postnatal depression**
